# Supplementary material for: Sensorimotor Learning Biases Choice Behavior: A Learning Neural Field Model for Decision Making
Source: PLOS journal article supplement (doi:10.1371/journal.pcbi.1002774), 2012-11-15
Supplement: S2 (10.1371/journal.pcbi.1002774.s002) [file journal.pcbi.1002774.s002]

*Table S2: Connection strengths*

| connection     | strength $w$ |
|----------------|--------------|
| <i>as</i>      | 5            |
| <i>ac</i>      | 4            |
| <i>ps</i>      | 5            |
| <i>pa</i>      | 0.075        |
| <i>mp</i>      | 3            |
| <i>pm, exc</i> | 9            |
| <i>pm, gi</i>  | 0.1          |
